# Supplementary material for: Benefits of VCE-003.2, a cannabigerol quinone derivative, against inflammation-driven neuronal deterioration in experimental Parkinson’s disease: possible involvement of different binding sites at the PPARγ receptor
Source: PubMed Central journal article supplement (PMC5771072; doi:10.1186/s12974-018-1060-5), 2018-01-16

|                      |   |   |   |     |   |   |   |     |
|----------------------|---|---|---|-----|---|---|---|-----|
| LPS                  | - | - | - | -   | + | + | + | +   |
| RGZ ( $\mu$ M)       | - | 1 | - | -   | - | 1 | - | -   |
| VCE-003.2 ( $\mu$ M) | - | - | 1 | 2.5 | - | - | 1 | 2.5 |

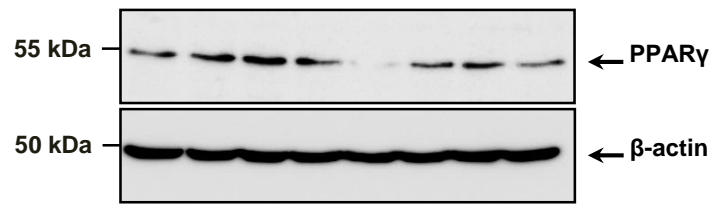

Supplement: 12974_2018_1060_MOESM2_ESM.pdf [file 12974_2018_1060_MOESM2_ESM.pdf]
