# Supplementary material for: Benefits of VCE-003.2, a cannabigerol quinone derivative, against inflammation-driven neuronal deterioration in experimental Parkinson’s disease: possible involvement of different binding sites at the PPARγ receptor
Source: Springer Nature journal article supplement (doi:10.1186/s12974-018-1060-5), 2018-01-16

**Ipsilateral side (lesioned)**

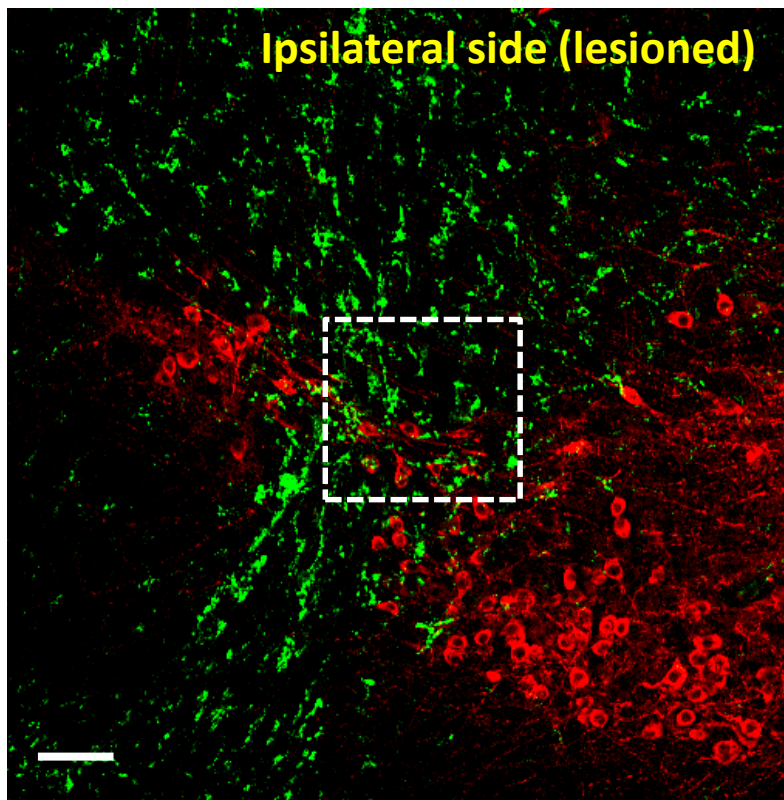

**Contralateral side (non-lesioned)**

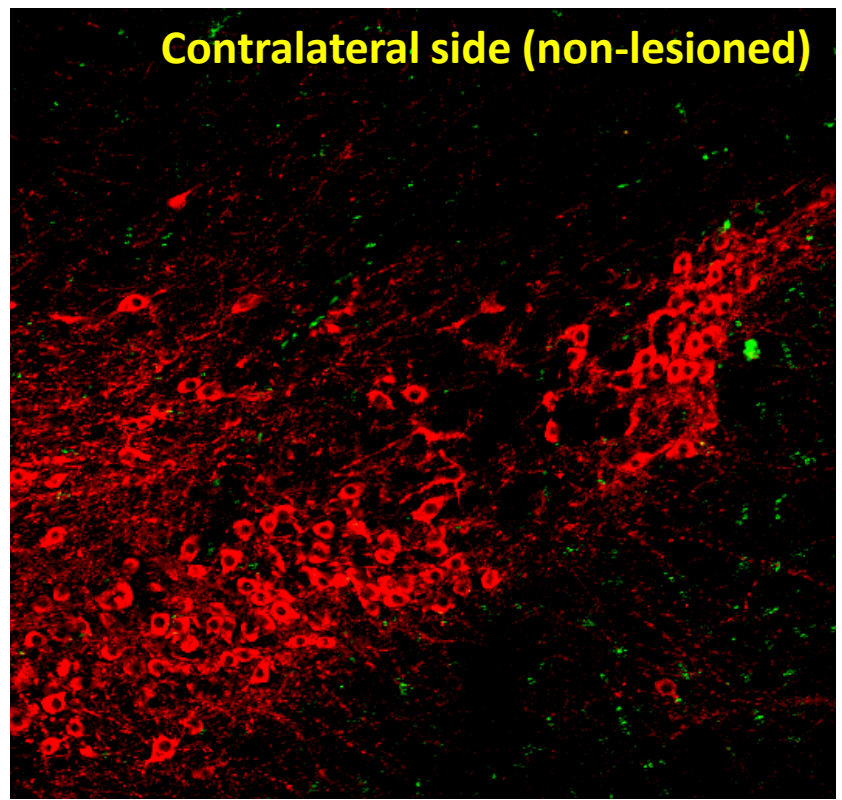

**Cd68**

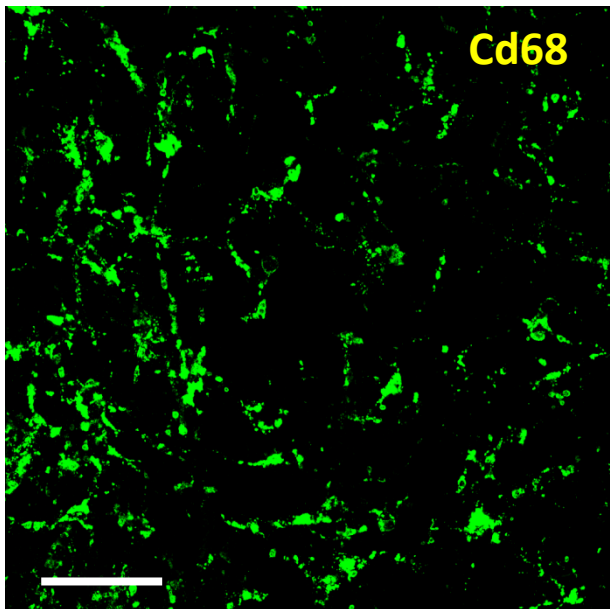

**TH**

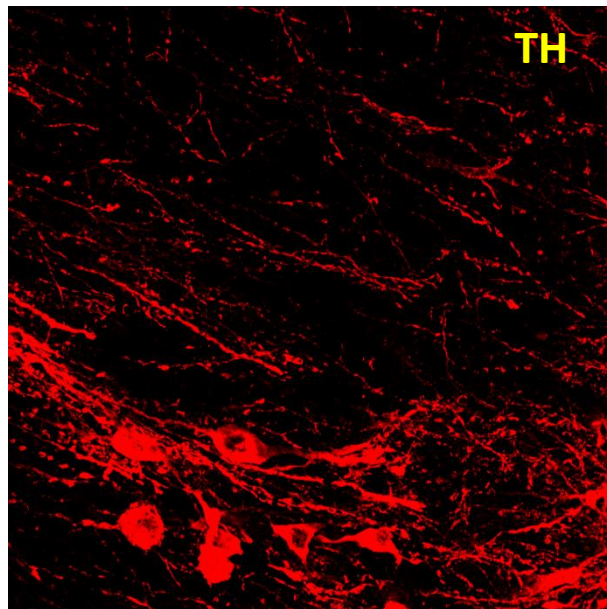

**merge**

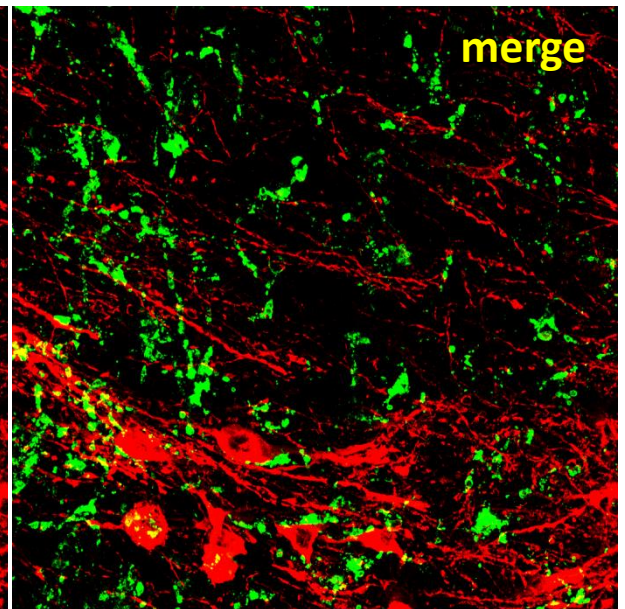

Supplement: MOESM1 [file 15368700]
